# Supplementary material
Source: PubMed Central journal article supplement (PMC4357943)
Supplement: AEM.03361-14_zam999116130so1.pdf [file AEM.03361-14_zam999116130so1.pdf]

The Global Regulator CodY<sub>St</sub> in *Streptococcus thermophilus* Controls the Metabolic Network for

Escalating Growth in the Milk Environment

Running title: CodY<sub>St</sub> in *Streptococcus thermophilus*

W.W. Lu<sup>1,2</sup>, Y. Wang<sup>1</sup>, T. Wang<sup>1</sup>, J. Kong<sup>1\*</sup>

*State Key Laboratory of Microbial Technology, Shandong University, Jinan, 250100, P. R. China*<sup>1</sup>

*State Key Laboratory of Food Science and Technology, School of Food Science and Technology,*

*Jiangnan University, Wuxi, 214000, P. R. China*<sup>2</sup>

\*Corresponding author.

E-mail address: [kongjian@sdu.edu.cn](mailto:kongjian@sdu.edu.cn)

Phone: 86 531 88362318

Fax: 86 531 88565234

Table. S1 The CodY<sub>St</sub>-box in genes

| Genes                        | +/- | Location | P-value  | Sequences containing CodY <sub>St</sub> -box       |
|------------------------------|-----|----------|----------|----------------------------------------------------|
| <i>ortholog of STND_1818</i> | +   | 174      | 4.76e-08 | TATGTGTAGAA <u>ATTTTCTGACAATT</u> ATGCTACAAT       |
| <i>ortholog of STND_1813</i> | +   | 89       | 4.76e-08 | GAATTACAGAA <u>ATATTCCGAAAATT</u> CATTGATATT       |
| <i>ortholog of STND_0590</i> | -   | 112      | 7.35e-08 | GTTATTTTGCA <u>AAAATTCTGACAATT</u> ATTTTATAAG      |
| <i>ortholog of STND_0733</i> | +   | 239      | 1.38e-07 | ACCAATTCAGATT <u>ATTCTGAAAATT</u> TGTTTTAGGA       |
| <i>ortholog of STND_1308</i> | +   | 180      | 1.51e-07 | ATATTTATATA <u>ATTTTCCGAAAATT</u> CTATCTTTTT       |
| <i>ortholog of STND_0811</i> | -   | 146      | 2.21e-07 | ATTATAGCAA <u>ATATTCCAGAAAATT</u> GAAACATATA       |
| <i>ortholog of STND_0425</i> | +   | 197      | 2.21e-07 | ACTTGACAAT <u>AAGATTCTGAAAATT</u> TATACTATTC       |
| <i>ortholog of STND_0466</i> | +   | 122      | 2.81e-07 | AAATGGCAGAA <u>ATATTCTGTCAATT</u> ACGATAGAAA       |
| <i>ortholog of STND_0352</i> | +   | 137      | 2.81e-07 | TATGATTGACA <u>ATTTTCTGATAATT</u> CTGTAACCTA       |
| <i>ortholog of STND_0370</i> | -   | 154      | 3.42e-07 | CAATTATAGCA <u>AAAATTCTGATAATT</u> TGTCACATTG      |
| <i>ortholog of STND_0154</i> | +   | 221      | 3.70e-07 | ATAGATTGCT <u>ATTTTCTGAAAATT</u> TGTGATACAAT       |
| <i>ortholog of STND_1235</i> | -   | 132      | 6.77e-07 | CAAGTTTATG <u>AAAATTCTGACGATT</u> AAACAAGTAG       |
| <i>ortholog of STND_1212</i> | -   | 147      | 1.16e-06 | TTAAATGAGT <u>AGTATTCAGAAAATT</u> TTTGACAAAAA      |
| <i>ortholog of STND_1528</i> | -   | 137      | 1.42e-06 | AGATGTCAAGA <u>ATTTTCTGTTAATT</u> TCGACAATTC       |
| <i>ortholog of STND_0611</i> | +   | 120      | 2.08e-06 | TGCTTTTTG <u>AAAATTTTGAAAAT</u> TAAGTCACAAA        |
| <i>ortholog of STND_0733</i> | +   | 198      | 3.42e-06 | AGCTATTGAA <u>ATTATTCCAACAATT</u> TGTGTA<br>AAAATG |

Table S2 The effect of the global regulator CodY<sub>St</sub> on the transcription of *gdhA*

| ST2017/ST2017 $\Delta$ <i>codY</i> | Transcriptome    | RT-qPCR |
|------------------------------------|------------------|---------|
| <i>gdhA</i>                        | 3.3 <sup>a</sup> | 2.8±0.2 |

<sup>a</sup> p-value=8.60E-58, FDR=1.61E-56

| ST2017/ST2017 $\Delta$ <i>codY</i>        |         |               | ST2017/ST2017 $\Delta$ <i>codY</i>        |         |               |
|-------------------------------------------|---------|---------------|-------------------------------------------|---------|---------------|
| log <sub>2</sub> (Fold_change) normalized |         |               | log <sub>2</sub> (Fold_change) normalized |         |               |
| Genes                                     | RT-qPCR | Transcriptome | Genes                                     | RT-qPCR | Transcriptome |
| <i>ortholog of STND_0027</i>              | 2.39    | 1.92          | <i>ortholog of STND_0425</i>              | -2.52   | -1.74         |
| <i>ortholog of STND_0113</i>              | 1.44    | 2.15          | <i>ortholog of STND_0433</i>              | 0.97    | 1.50          |
| <i>ortholog of STND_0115</i>              | 1.84    | 1.94          | <i>ortholog of STND_0611</i>              | -2.11   | -1.46         |
| <i>ortholog of STND_0119</i>              | -1.72   | -1.54         | <i>ortholog of STND_0658</i>              | -2.20   | -3.50         |
| <i>ortholog of STND_0135</i>              | 1.21    | 1.52          | <i>ortholog of STND_0782</i>              | 1.48    | 2.23          |
| <i>ortholog of STND_0154</i>              | -2.41   | -1.58         | <i>ortholog of STND_0811</i>              | -4.45   | -2.88         |
| <i>ortholog of STND_0182</i>              | -1.75   | -3.01         | <i>ortholog of STND_1004</i>              | -1.80   | -1.64         |
| <i>ortholog of STND_0202</i>              | -1.80   | -0.94         | <i>ortholog of STND_1007</i>              | -1.76   | -3.22         |
| <i>ortholog of STND_0203</i>              | -1.93   | -3.17         | <i>ortholog of STND_1212</i>              | -1.09   | -1.50         |
| <i>ortholog of STND_0204</i>              | -1.26   | -1.10         | <i>ortholog of STND_1346</i>              | 1.95    | 1.54          |
| <i>ortholog of STND_0306</i>              | -0.91   | -0.58         | <i>ortholog of STND_1569</i>              | -2.69   | -4.11         |
| <i>ortholog of STND_0307</i>              | -1.11   | -1.73         | <i>ortholog of STND_1785</i>              | 0.99    | 1.20          |
| <i>ortholog of STND_0352</i>              | -3.28   | -3.34         | <i>ortholog of STND_1813</i>              | -3.43   | -3.15         |

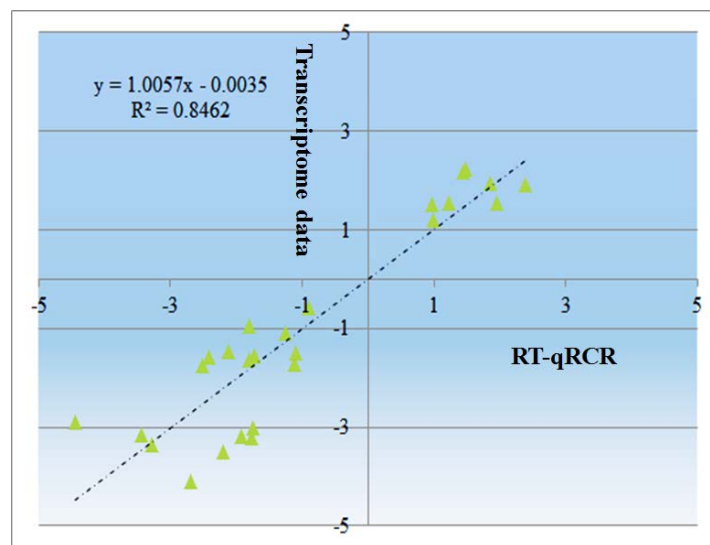

Fig. S1 Scatter plot comparative analysis of transcriptome and RT-qPCR experiments. Each data point represents the logarithmic ratio of the signal intensity determined for 26 CodY<sub>St</sub>-regulated genes (*orthologs of STND\_0027, STND\_0113, STND\_0115, STND\_0119, STND\_0135, STND\_0154, STND\_0182, STND\_0202, STND\_0203, STND\_0204, STND\_0306, STND\_0307, STND\_0352, STND\_0425, STND\_0433, STND\_0611, STND\_0658, STND\_0782, STND\_0811, STND\_1004, STND\_1007, STND\_1212, STND\_1346, STND\_1569, STND\_1785, STND\_1813*) for the wild-type and the *codY* mutant strains, as determined by both RT-qPCR and transcriptome analyses. R<sup>2</sup>, Pearson correlation coefficient.

Fig. S2

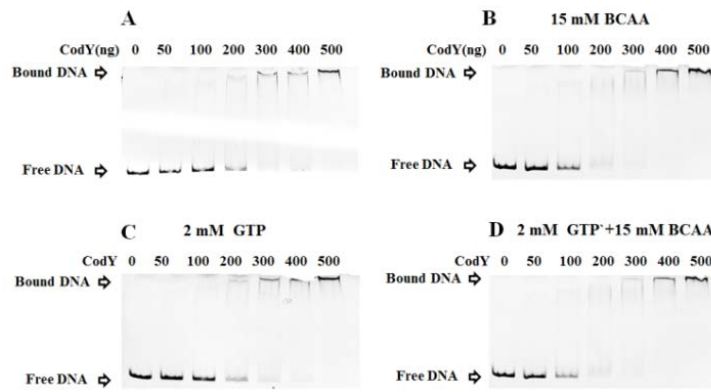

Fig. S2 Effects of BCAA and GTP on CodY<sub>St</sub> binding to *gdhA* promoter region. A 253-bp DNA fragment containing the *gdhA* promoter region (100 ng) was incubated with or without various concentrations of CodY<sub>St</sub> protein from *S. thermophilus* ST2017 in the presence or not of 15 mM of BCAA, 2 mM of GTP, or both and analyzed on non-denaturing polyacrylamide gel electrophoresis.
